# Supplementary material for: Polyoxometalate-encapsulated metal–organic frameworks for photocatalytic uranium isolation
Source: Royal Society of Chemistry journal article supplement (doi:10.1039/d4sc05349d), 2024-01-01
Supplement: d4sc05349d1.pdf [file d4sc05349d1.pdf]

## Supplementary Information

### Polyoxometalate-Encapsulated Metal-Organic Framework for Photocatalytic Uranium Isolation

Zhimin Dong<sup>#</sup>, Dongling Zeng<sup>#</sup>, Zifan Li, Junjie Chen, Youqun Wang, Xiaohong Cao, Guoping Yang\*, Zhibin Zhang\*, Yunhai Liu, Feng Yang\*

#### Results and Discussion

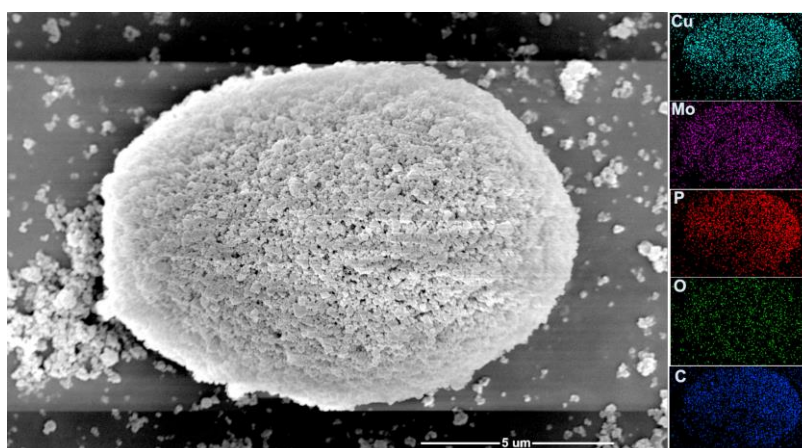

**Figure S1.** SEM image and EDS mapping of POM@Cu-MOFs.

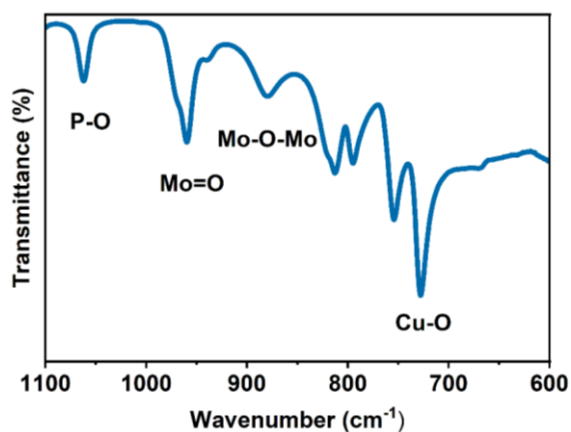

**Figure S2.** Partially magnified FT-IR spectrum of POM@Cu-MOFs at 600 to 1100  $\text{cm}^{-1}$ .

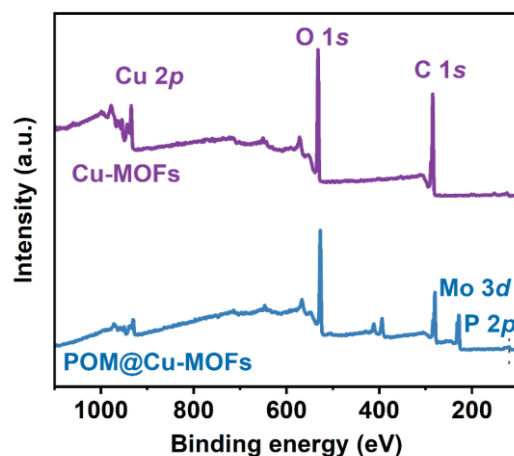

**Figure S3.** The survey scan of XPS spectra of Cu-MOFs and POM@Cu-MOFs.

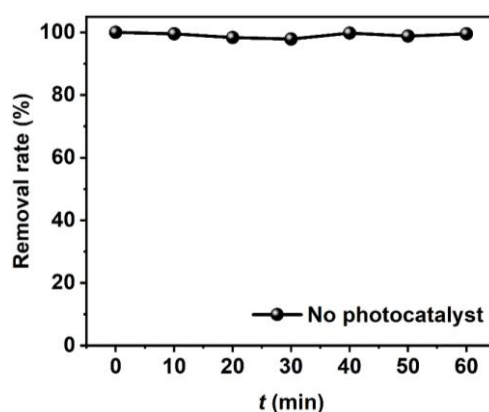

**Figure S4.** Removal performance of U(VI) without photocatalyst ( $C_{U(VI)} = 50 \text{ mg}\cdot\text{L}^{-1}$ ,  $pH = 4.0$ ,  $C_{Ca^{2+}} = 0.001 \text{ mol}\cdot\text{L}^{-1}$ ).

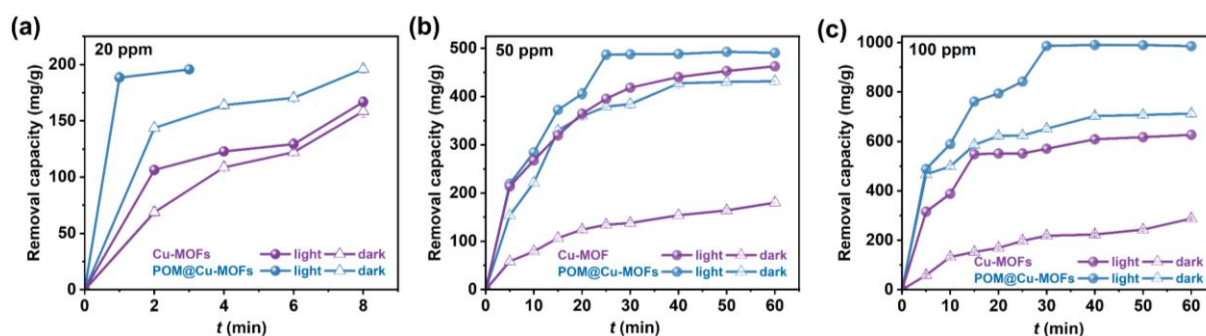

**Figure S5.** Uranium removal by Cu-MOFs and POM@Cu-MOFs using the photocatalytic reduction method compared to the adsorption method in the dark with initial uranium concentrations of (a)  $\sim 20 \text{ mg}\cdot\text{L}^{-1}$ , (b)  $\sim 50 \text{ mg}\cdot\text{L}^{-1}$ , (c)  $\sim 100 \text{ mg}\cdot\text{L}^{-1}$  ( $m/V = 0.1 \text{ g}\cdot\text{L}^{-1}$ ,  $pH = 4.0$ ,  $C_{Ca^{2+}} = 0.001 \text{ mol}\cdot\text{L}^{-1}$ ).

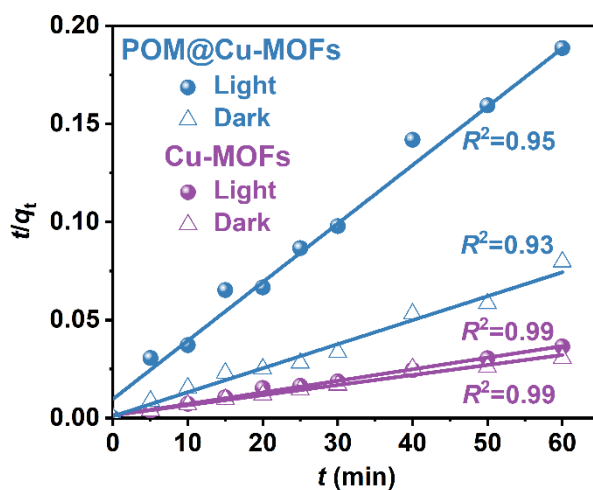

**Figure S6.** The pseudo-second-order kinetics model for Cu-MOFs and POM@Cu-MOFs photocatalytic isolation of U(VI) with an initial uranium concentrations of  $\sim 200 \text{ mg}\cdot\text{L}^{-1}$ .

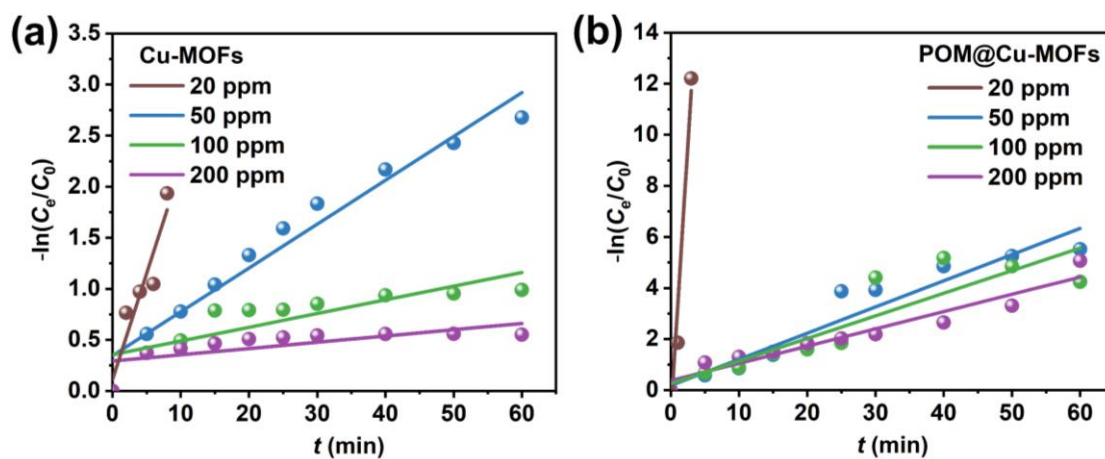

**Figure S7.** Corresponding pseudo-first-order kinetics model for photocatalytic isolation of U(VI) with different concentrations over (a) Cu-MOF and (b) POM@Cu-MOF catalysts.

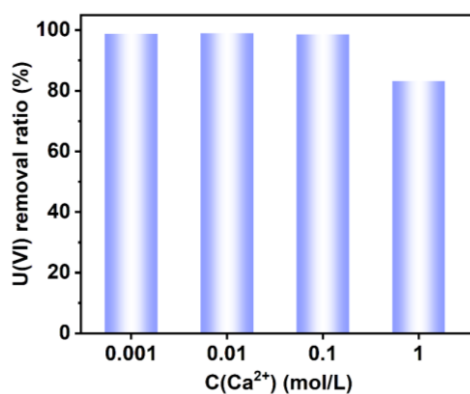

**Figure S8.** Effect of  $\text{Ca}^{2+}$  concentration on photocatalytic removal of uranium ( $C_{\text{U(VI)}} = 50 \text{ mg}\cdot\text{L}^{-1}$ ,  $m/V = 0.1 \text{ g}\cdot\text{L}^{-1}$ ,  $\text{pH} = 4.0$ ).

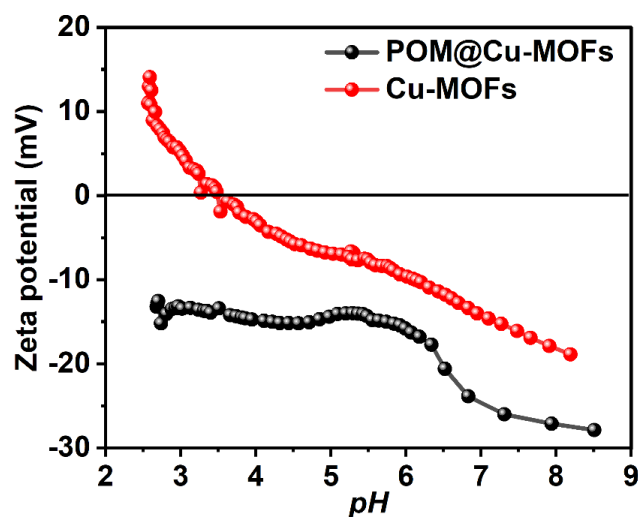

**Figure S9.** Surface zeta potentials of Cu-MOFs and POM@Cu-MOFs.

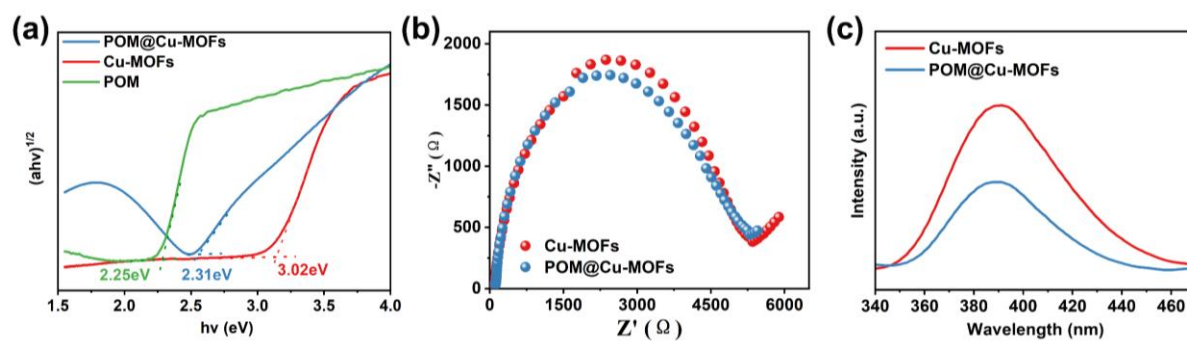

**Figure S10.** (a) Plots of transformed Kubelka-Munk function versus photon energy. (b) Electrochemical impedance spectroscopy Nyquist plots of Cu-MOFs and POM@Cu-MOFs. (c) PL spectroscopy of Cu-MOFs and Cu-MOF@POM.

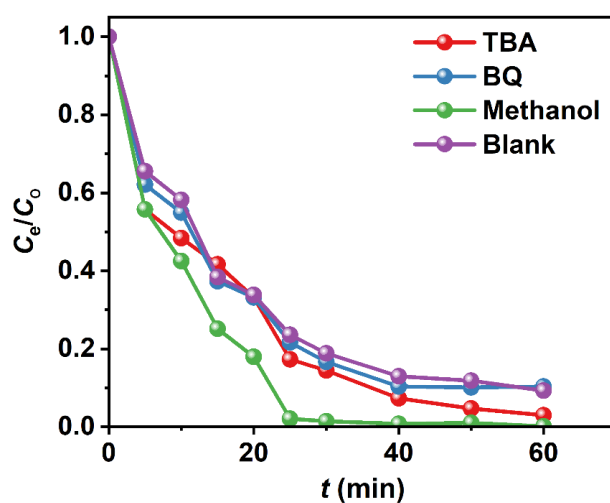

**Figure S11.** Effect of radical quenching on phenol degradation with POM@Cu-MOFs.

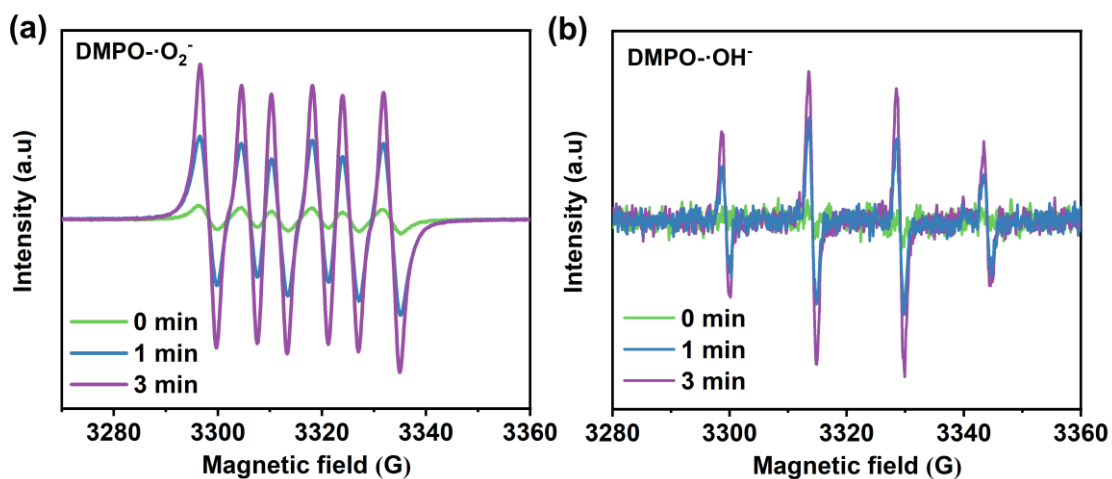

**Figure S12.** ESR signals of (a)  $\cdot\text{O}_2^-$  and (b)  $\cdot\text{OH}$  in the POM@Cu-MOFs before and after illumination.

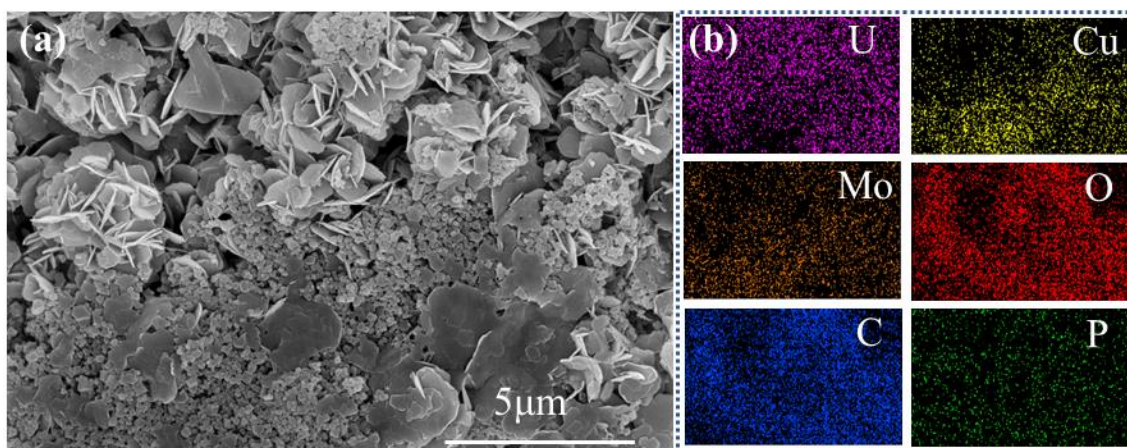

**Figure S13.** SEM image of POM@Cu-MOFs after photocatalytic reduction (a) and EDS mapping (b).

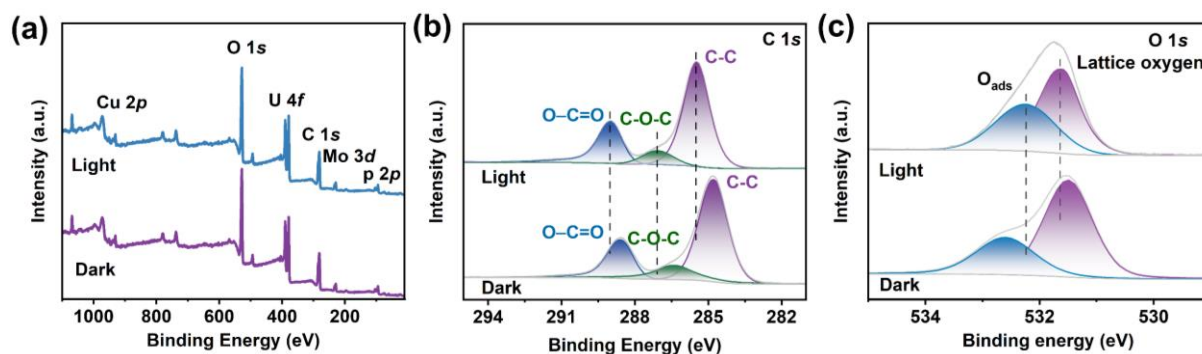

**Figure S14.** Comparison of the XPS spectra of POM@Cu-MOFs after photocatalytic reduction and absorption: (a) survey spectra, (b) C 1s, and (c) O 1s.

**Table S1.** Comparison of adsorption capacity of various materials for U(VI) ions

| Sorbents                        | Condition      | pH  | m/V<br>(g/L) | $C_0$<br>(mg·L <sup>-1</sup> ) | $q_e$<br>(mg/g) | Ref.                      |
|---------------------------------|----------------|-----|--------------|--------------------------------|-----------------|---------------------------|
| PMO <sub>12</sub> /UiO-66       | Photocatalysis | 5.5 | 0.2          | 160                            | 225.36          | [S1]                      |
| SCU-19                          | Photocatalysis | 4   | 0.5          | 400                            | 728.34          | [S2]                      |
| PN-PCN-222                      | Photocatalysis | 4   | 0.25         | 400                            | 1289.3          | [S3]                      |
| Bi <sub>2</sub> WO <sub>6</sub> | Photocatalysis | 6.5 | 0.057        | 30                             | 246.75          | [S4]                      |
| GO-POM                          | Adsorption     | 4   | 0.2          | 50                             | 232.04          | [S5]                      |
| CS-NZVI                         | Adsorption     | 5   | 0.1          | 30.94                          | 591.72          | [S6]                      |
| POM@Cu-MOFs                     | Photocatalysis | 4   | 0.1          | 200                            | 1637.39         | <a href="#">This work</a> |

### Supplemental reference

- S1. Z. Zhang, Z. Li, Z. Dong, F. Yu, Y. Wang, Y. Wang, X. Cao, Y. Liu, and Y. Liu, *Chin. Chem. Lett.*, 2022, **33**, 3577–3580.
- S2. H. Zhang, W. Liu, A. Li, D. Zhang, X. Li, F. Zhai, L. Chen, L. Chen, Y. Wang, S. Wang, *Angew. Chem. Int. Ed.*, 2019, **58**, 16110–16114.
- S3. H. Li, F. Zhai, D. Gui, X. Wang, C. Wu, D. Zhang, X. Dai, H. Deng, X. Su, J. Diwu, *Appl. Catal. B Environ. Energy*, 2019, **254**, 47–54.
- S4. X. Zhong, Y. Liu, T. Hou, Y. Zhu, B. Hu, *J. Environ. Chem. Eng.*, 2022, **10**, 107170.
- S5. X. Han, Y. Wang, X. Cao, Y. Dai, Y. Liu, Z. Dong, Z. Zhang, Y. Liu, *Appl. Surf. Sci.*, 2019, **484**, 1035–1040.
- S6. Q. Zhang, D. Zhao, S. Feng, Y. Wang, J. Jin, A. Alsaedi, T. Hayat, C. Chen, *J. Colloid Interface Sci.*, 2019, **552**, 735–743.
